# Supplementary material
Source: publisher site journal article supplement (https://www.dovepress.com/article/442281)
Supplement: Supplementary file 1 [file get_supplementary_file.php]

Supplementary Table1 Search strategies for every databases

| Database | Query | #ID |
| --- | --- | --- |
| CNKI | （SU= Chronic Obstructive Pulmonary Diseases OR TKA=COPD OR TKA= Chronic Obstructive Airway Disease OR TKA= Chronic Obstructive Airway OR TKA= COAD）AND（SU= chuankezhi OR TKA= chuankezhi） |  |
| VIP | M=( Chronic Obstructive Pulmonary Diseases OR COPD OR COAD) AND M=( chuankezhi) |  |
| WanFang | SU(“Chronic Obstructive Pulmonary Diseases” or “COPD” or “Chronic Obstructive Airway Disease” or “COAD”） and SU(“chuankezhi”） |  |
| Sinomed | (Chronic Obstructive Pulmonary Diseases OR COPD OR Chronic Obstructive Airway Disease OR COAD) AND chuankezhi |  |
| Pubmed | ("Pulmonary Disease, Chronic Obstructive"[Mesh]) OR (Chronic Obstructive[Title/Abstract])) OR (Chronic Obstructive Lung Disease[Title/Abstract])) OR (Chronic Obstructive Pulmonary Diseases[Title/Abstract])) OR (COAD[Title/Abstract])) OR (COPD[Title/Abstract])) OR (Chronic Obstructive Airway Disease[Title/Abstract]))OR (Airflow Obstruction, Chronic[Title/Abstract])) OR (Airflow Obstructions, Chronic[Title/Abstract])) OR (Chronic Airflow Obstructions[Title/Abstract])) OR (Chronic Airflow Obstruction[Title/Abstract])) | #1 |
| (chuankezhi [Title/Abstract]) OR (chuankezhi injection [Title/Abstract]) | #2 |
| #1 AND #2 | #3 |
| Cochrane Library | MeSH descriptor: [Pulmonary Disease, Chronic Obstructive] explode all trees | #1 |
| (Pulmonary Disease, Chronic Obstructive):ti,ab,kw OR(Chronic Obstructive Lung Disease)::ti,ab,kw OR(Chronic Obstructive Pulmonary Diseases):ti,ab,kw OR(COAD):ti,ab,kw OR(COPD):ti,ab,kw OR(Chronic Obstructive Airway Disease):ti,ab,kw OR(Chronic Obstructive Airway Disease):ti,ab,kw OR(Airflow Obstructions, Chronic):ti,ab,kw OR(Chronic Airflow Obstructions):ti,ab,kw | #2 |
| #1 AND #2 | #3 |
| (chuankezhi):ti,ab,kw OR(chuankezhi injection):ti,ab,kw | #4 |
| #3 AND #4 | #5 |
| Embase | ‘Chronic Obstructive Pulmonary Disease’/exp OR ‘Chronic Obstructive Lung Disease’/exp OR ‘Chronic Obstructive Airway’/exp OR‘Chronic Airflow Obstruction’/exp OR ‘COPD’ /exp | #1 |
| ‘chuankezhi’/exp OR ‘chuankezhi’/ti | #2 |
| #1AND#2 | #3 |
| Web of Science | TS=(Pulmonary Disease, Chronic Obstructive) OR AB=(Chronic Obstructive )) OR (Chronic Obstructive Lung Disease )) OR (Chronic Obstructive Pulmonary Diseases )) OR (COAD )) OR (COPD )) OR (Chronic Obstructive Airway Disease )) OR (Chronic Obstructive Pulmonary Disease )) OR (Airflow Obstruction, Chronic )) OR (Airflow Obstructions, Chronic )) OR (Chronic Airflow Obstructions )) OR (Chronic Airflow Obstruction )) | #1 |
| TS= (chuankezhi) OR (chuankezhi injections)) OR (chuankezhi injection)) OR (chuankezhi injectables)) OR (chuankezhi injectable)) | #2 |
| #1AND#2 | #3 |
